# Supplementary material
Source: Springer Nature journal article supplement (https://www.springermedizin.de/resource/supplementary/12913_2008_940_MOESM1_ESM.pdf/9536506)
Supplement: MOESM1 [file 9536506]

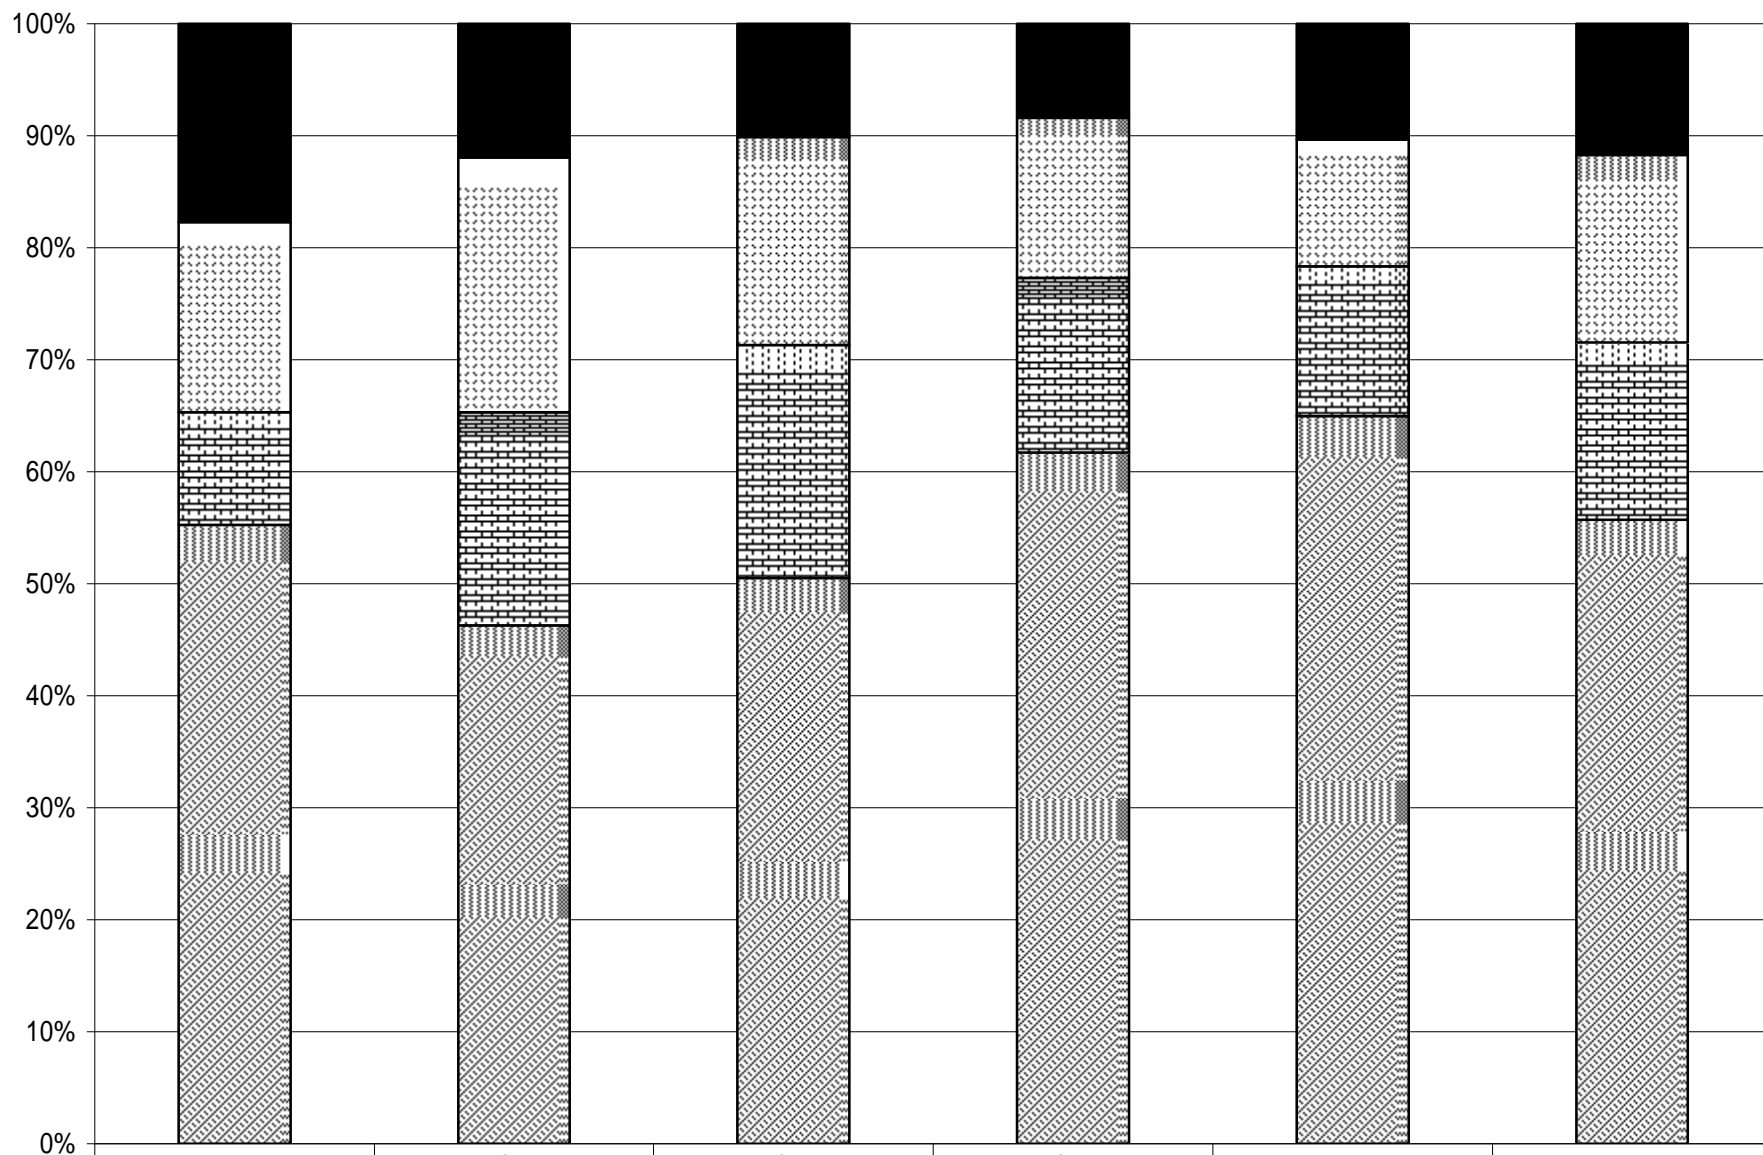

|                       | Poorest | 2nd Quintile | 3rd Quintile | 4th Quintile | Richest | Total |
|-----------------------|---------|--------------|--------------|--------------|---------|-------|
| ■ OOP >= 40% of CPT   | 17.7    | 12.0         | 10.1         | 8.4          | 10.3    | 11.7  |
| ▩ OOP = 20-40% of CPT | 17.0    | 22.8         | 18.6         | 14.3         | 11.3    | 16.8  |
| ▨ OOP = 10-20% of CPT | 10.1    | 19.0         | 20.8         | 15.6         | 13.4    | 15.8  |
| ▧ OOP = 0-10% of CPT  | 55.3    | 46.3         | 50.5         | 61.7         | 64.9    | 55.7  |
